# Supplementary material for: Genome-wide association study for polledness, horn shape, and wool traits in Original Valachian sheep
Source: Copernicus journal article supplement (doi:10.5194/aab-67-373-2024), 2024-07-30
Supplement: Supplementary file [file aab-67-373-2024-supplement.pdf]

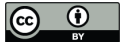

*Supplement of*

## **Genome-wide association study for polledness, horn shape, and wool traits in Original Valachian sheep**

**Mária Mészárosová et al.**

*Correspondence to:* Nina Moravčíková (nina.moravcikova@uniag.sk)

The copyright of individual parts of the supplement might differ from the article licence.

**Table S1.** QTL content in the genomic regions of 1 Mb centered on the most significant SNP from the GWAS study (source: <https://animalgenome.org/QTLdb/> ).

| Phenotype                        | Chr | Position (Mb) | SNP name         | $-\log_{10}(p)$ from GWAS | QTL                                                                   | Gene content                                                                                             |
|----------------------------------|-----|---------------|------------------|---------------------------|-----------------------------------------------------------------------|----------------------------------------------------------------------------------------------------------|
| Polledness                       | 6   | 93.37         | Chr6:93370144    | 4.46                      | Milk protein percentage<br>Milk yield<br>Reactivity to humans         | <i>CXCL13</i> ,<br><i>CNOT6L</i> ,<br><i>MRPL1</i> ,<br><i>FRAS1</i>                                     |
| Polledness                       | 10  | 29.45         | RXFP2_insert_L1  | 4.15                      | Horn type<br>Horn circumference<br>Horn length<br>Tail fat deposition | <i>ZAR1L</i> , <i>FRY</i> ,<br><i>RXFP2</i> ,<br><i>B3GLCT</i>                                           |
| Polledness                       | 10  | 30.91         | OAR10_31042465.1 | 11.11                     | Horn type<br>Horn circumference<br>Horn length<br>Tail fat deposition | <i>USPL1</i> ,<br><i>HMGB1</i> ,<br><i>KATNAL1</i> ,<br><i>UBL3</i> ,<br><i>SLC7A1</i> ,<br><i>MTUS2</i> |
| side-way turned horns vs polled  | 2   | 143.33        | OAR2_143337545.1 | 4.98                      | Intermuscular fat weight                                              | <i>SCN7A</i> ,<br><i>SCN1A</i> ,<br><i>SCN9A</i> ,<br><i>TTC21B</i>                                      |
| side-way turned horns vs polled  | 4   | 83.45         | OAR4_88648994.1  | 4.96                      | No QTL                                                                | <i>YAE1</i> ,<br><i>POU6F2</i> ,<br><i>VPS41</i>                                                         |
| side-way turned horns vs polled  | 6   | 88.76         | OAR6_88762364.1  | 6.12                      | Fecal egg count                                                       | <i>ADAMTS3</i> ,<br><i>ANKRD17</i> ,<br><i>ALB</i> , <i>AFM</i>                                          |
| side-way turned horns vs polled  | 10  | 30.91         | OAR10_31042465.1 | 9.89                      | Horn type                                                             | <i>USPL1</i> ,<br><i>HMGB1</i> ,<br><i>KATNAL1</i> ,<br><i>UBL3</i> ,<br><i>SLC7A1</i> ,<br><i>MTUS2</i> |
| side-way turned horns vs polled  | 23  | 14.93         | s43526.1         | 5.11                      | Body and carcass weight<br>Average daily gain<br>Foot angle           | No protein coding genes                                                                                  |
| Backwards-curved horns vs polled | 2   | 247.47        | DU499350_422.1   | 5.08                      | Milk fat percentage<br>Carcass and body weight                        | <i>UBR4</i> , <i>IFFO2</i> ,<br><i>ALDH4A1</i> ,<br><i>TAS1R2</i> ,<br><i>PAX7</i>                       |

|                                               |    |        |                             |       | Bone density                                                          |                                                                                         |
|-----------------------------------------------|----|--------|-----------------------------|-------|-----------------------------------------------------------------------|-----------------------------------------------------------------------------------------|
| Backwards-curved horns vs polled              | 4  | 103.41 | s11139.1                    | 5.34  | Blood characteristics<br>Pneumonia susceptibility                     | <i>DGKI</i> ,<br><i>CREB3L2</i> ,<br><i>AKR1D1</i> ,<br><i>TRIM24</i> ,<br><i>SVOPL</i> |
| Backwards-curved horns vs polled              | 10 | 31.29  | s03052.1                    | 5.91  | Horn type<br>Fecal egg count<br>Carcass traits                        | <i>UBL3</i> ,<br><i>SLC7A1</i> ,<br><i>MTUS2</i> ,<br><i>SLC46A3</i>                    |
| Backwards-curved horns vs polled              | 26 | 31.67  | OAR26_31673849_X.1          | 5.32  | Stature<br>Carcass weight<br>Udder attachment                         | <i>KCNU1</i> ,<br><i>ZNF703</i> ,<br><i>ERLIN2</i> ,<br><i>PLPBP</i>                    |
| Backwards-curved horns vs polled              | 26 | 40.22  | OAR26_40222433.1            | 5.46  | Stature<br>Body weight<br>Vocalization traits                         | <i>RARB</i>                                                                             |
| side-way turned vs backwards-curved horns     | 1  | 260.79 | s52939.1                    | 6.16  | No QTL                                                                | <i>LCA5L</i> ,<br><i>B3GALT5</i> ,<br><i>IGSF5</i> , <i>PCP4</i> ,<br><i>DSCAM</i>      |
| side-way turned vs the backwards-curved horns | 3  | 42.35  | s73851.1                    | 13.86 | No QTL                                                                | <i>MEIS1</i>                                                                            |
| side-way turned vs the backwards-curved horns | 3  | 82.69  | s12856.1                    | 7.13  | Body weight<br>Average daily gain<br>Milk yield                       | No protein coding genes                                                                 |
| side-way turned vs the backwards-curved horns | 10 | 0.01   | OAR10_12531.1               | 8.51  | No QTL                                                                | <i>PCDH20</i>                                                                           |
| side-way turned vs the backwards-curved horns | 10 | 29.45  | RXFP2_insert_L1<br>29456050 | 6.85  | Horn type<br>Horn length<br>Horn circumference<br>Tail fat deposition | <i>ZAR1L</i> , <i>FRY</i> ,<br><i>RXFP2</i> ,<br><i>B3GLCT</i>                          |
| side-way turned vs the backwards-curved horns | 17 | 14.11  | Chr17:14112366              | 5.96  | Fecal egg count                                                       | <i>FREM3</i> ,<br><i>SMARCA5</i>                                                        |
| side-way turned vs the backwards-curved horns | 22 | 43.75  | oar3_OAR22_43747064         | 6.74  | Carcass bone percentage<br>Muscle density                             | <i>CHST15</i> ,<br><i>OAT</i> , <i>NKX1-2</i> , <i>FAM53B</i> ,<br><i>EEF1AKMT2</i> ,   |

|                                                         |    |       |                     |      |                                                                                                                     |                                                                                                                                                                                                                                                                           |
|---------------------------------------------------------|----|-------|---------------------|------|---------------------------------------------------------------------------------------------------------------------|---------------------------------------------------------------------------------------------------------------------------------------------------------------------------------------------------------------------------------------------------------------------------|
|                                                         |    |       |                     |      |                                                                                                                     | <i>ABRAXAS2,<br/>ZRANB1,<br/>CTBP2</i>                                                                                                                                                                                                                                    |
| side-way<br>turned vs the<br>backwards-<br>curled horns | 26 | 40.87 | oar3_OAR26_40876522 | 6.16 | Vocalisation<br>behavior<br>Vocalisation<br>during isolation<br>box test<br>Vocalisation<br>during corridor<br>test | <i>THRB,<br/>NR1D2</i>                                                                                                                                                                                                                                                    |
| side-way<br>turned vs the<br>backwards-<br>curled horns | 26 | 42.44 | oar3_OAR26_42437568 | 8.75 | No QTL                                                                                                              | <i>UBE2E2,<br/>ZNF385D</i>                                                                                                                                                                                                                                                |
| wool colour<br>(white vs<br>black)                      | 14 | 14.23 | oar3_OAR14_14231948 | 6.13 | Coat colour<br>Fecal egg count<br>Total lambs<br>born                                                               | <i>ACSF3,<br/>CDH15,<br/>SLC22A31,<br/>ANKRD11,<br/>SPG7, RPL13,<br/>CPNE7,<br/>DPEP1,<br/>CHMP1A,<br/>CDK10,<br/>SPATA2L,<br/>ZNF276,<br/>VPS9D1,<br/>FANCA,<br/>SPIRE2,<br/>TCF25,<br/>MC1R, DEF8,<br/>DBNDD1,<br/>GAS8,<br/>SHCBP1,<br/>VPS35,<br/>ORC6,<br/>MYLK3</i> |
| wool colour<br>(white vs<br>black)                      | 20 | 10.77 | oar3_OAR20_10774806 | 6.30 | Milk Yield                                                                                                          | <i>BNIP5,<br/>KCTD20,<br/>PXT1, STK38,<br/>SRSF3,<br/>CDKN1A,<br/>RAB44,<br/>CPNE5,<br/>PPIL1, PI16,<br/>FGD2,<br/>MTCH1,<br/>PIM1,</i>                                                                                                                                   |

---

|                                    |    |       |          |      |        |                                    |
|------------------------------------|----|-------|----------|------|--------|------------------------------------|
|                                    |    |       |          |      |        | <i>TBC1D22B,</i><br><i>TMEM217</i> |
| wool colour<br>(white vs<br>black) | 24 | 15.37 | s05526.1 | 5.75 | No QTL | <i>ABCC1,</i><br><i>ABCC6</i>      |

---
